Just Published!

American Psychiatric Association Publishing

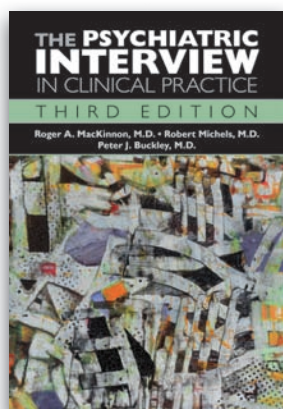

## The Psychiatric Interview in Clinical Practice, Third Edition

Roger A. MacKinnon, M.D., Robert Michels, M.D., and Peter J. Buckley, M.D.

It has been nearly a half-century since the inaugural edition of *The Psychiatric Interview in Clinical Practice*, and the book's status as a classic was again validated with the second edition a decade ago. This new, third edition maintains the book's reputation with thoroughly updated content that reflects changes brought about by the publication of DSM-5. The book presents the psychiatric interview in the context of the enormous and ongoing progress that has been made in biological and descriptive psychiatry. In addition, the book emphasizes the shift in the social

relationship between patient and clinician, recognizing that the therapeutic alliance has become the foundation of all medical treatment efforts and that patients are now better informed and seek active involvement in treatment decisions. The text reflects this growing equality and supports the clinician's efforts to nurture the relationship for optimum therapeutic outcomes. The chapter on the traumatized patient has been completely updated for this edition, and a chapter on the patient with dissociative identity disorder has been added.

*The Psychiatric Interview in Clinical Practice* will benefit mental health clinicians, both seasoned and in training, ensuring that their skills are current and their knowledge cutting-edge.

2016 • 704 pages • ISBN 978-1-61537-034-4 • Hardcover • \$79.00 • Item #37034

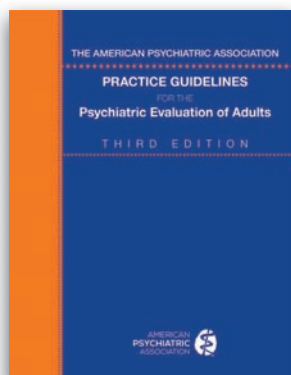

## The American Psychiatric Association Practice Guidelines for the Psychiatric Evaluation of Adults, Third Edition

American Psychiatric Association

This new edition of the practice guidelines on psychiatric evaluation for adults is the first set of the APA's guidelines developed under the new guideline development process. These guidelines address the following nine topics, in the context of an initial psychiatric evaluation: review of psychiatric symptoms, trauma history, and treatment history; substance use assessment; assessment of suicide risk; assessment for risk of aggressive behaviors;

assessment of cultural factors; assessment of medical health; quantitative assessment; involvement of the patient in treatment decision making; and documentation of the psychiatric evaluation. Each guideline recommends or suggests topics to include during an initial psychiatric evaluation. Findings from an expert opinion survey have also been taken into consideration in making recommendations or suggestions. In addition to reviewing the available evidence on psychiatry evaluation, each guideline also provides guidance to clinicians on implementing these recommendations to enhance patient care.

2016 • 170 pages • ISBN 978-0-89042-465-0 • Paperback • \$65.00 • Item #2465

2016 • 170 pages • ISBN 978-0-89042-675-3 • eBook • \$52.00 • Item #2675

Order Now

[www.appi.org](http://www.appi.org)

AMERICAN  
PSYCHIATRIC  
ASSOCIATION  
PUBLISHING

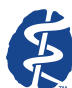

[www.appi.org](http://www.appi.org)

Email: [appi@psych.org](mailto:appi@psych.org)

Toll Free: 1-800-368-5777

20% Discount for American Psychiatric Association Members

25% Discount for APA Resident-Fellow Members

Please use Priority Code AH1553 when ordering. Find us on [f](#) and [t](#).

# Understanding Mental Disorders

## Your Guide to DSM-5®

American Psychiatric Association

**A consumer guide for anyone who has been touched by mental illness!**

***Understanding Mental Disorders: Your Guide to DSM-5®*** is a vital resource for anyone who has been touched by mental illness.

Most of us know someone who suffers from a mental illness. This book helps those who may be struggling with mental health problems, as well as those who want to help others achieve mental health and well-being.

Based on the latest, fifth edition of the *Diagnostic and Statistical Manual of Mental Disorders*—known as DSM-5®—***Understanding Mental Disorders*** provides valuable insight on what to expect from an illness and its treatment—and will help readers recognize symptoms, know when to seek help, and get the right care. Featured disorders include depression, schizophrenia, ADHD, autism spectrum disorder, posttraumatic stress disorder, and bipolar disorder, among others.

The common language for diagnosing mental illness used in DSM-5® for mental health professionals has been adapted into clear, concise descriptions of disorders for nonexperts. In addition to specific symptoms for each disorder, readers will find:

- Risk factors and warning signs
- Related disorders
- Ways to cope
- Tips to promote mental health
- Personal stories
- Key points about the disorders and treatment options
- A special chapter dedicated to treatment essentials and ways to get help
- Helpful resources that include a glossary, list of medications and support groups

For more resources and information, go to [www.psychiatry.org/UnderstandingMentalDisorders](http://www.psychiatry.org/UnderstandingMentalDisorders)

2015 • 370 pages • ISBN 978-1-58562-491-1 • Paperback • \$24.95 • Item #62491

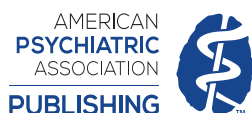

Order Online: [www.appi.org](http://www.appi.org)

Phone: 703-907-7322 • Toll Free: 1-800-368-5777

Email: [appi@psych.org](mailto:appi@psych.org)

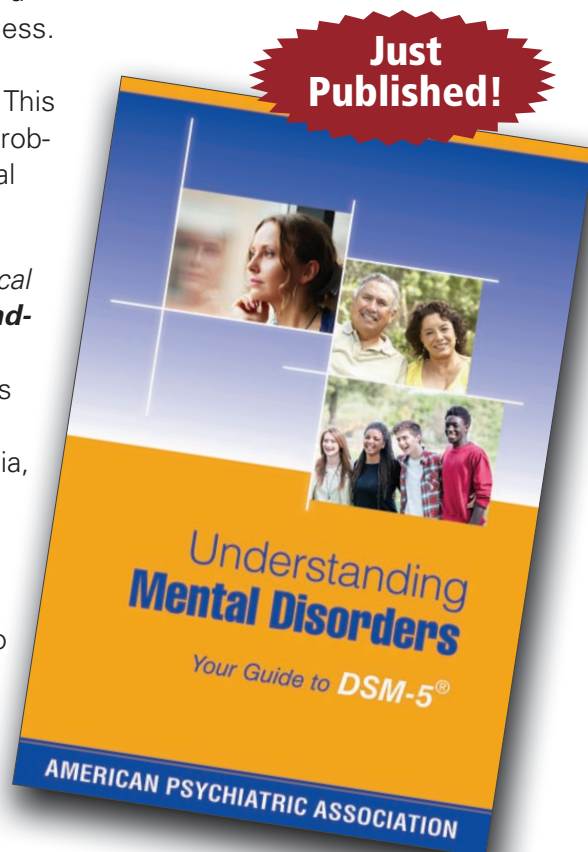

With Foreword by  
Patrick J. Kennedy

20% Discount for American Psychiatric  
Association Members

25% Discount for APA Resident-Fellow Members AH1512R

# American Neuropsychiatric Association

The American Neuropsychiatric Association (ANPA), established in 1988, is an organization of professionals in neuropsychiatry, behavioral neurology, neuropsychology and the clinical neurosciences. Our mission is to improve the lives of people with disorders at the interface of psychiatry and neurology.

One strength of our organization is our diverse membership, which is comprised of professionals in all areas of neuroscience who share clinical and/or academic interests in neuropsychiatry. The interdisciplinary makeup of the membership encourages collaboration among educators, clinicians, researchers, students and trainees during research presentations, symposia, workshops, and continuing education courses. *The Journal of Neuropsychiatry and Clinical Neurosciences (JNCN)* is the official publication of the organization, and a subscription is a benefit of membership.

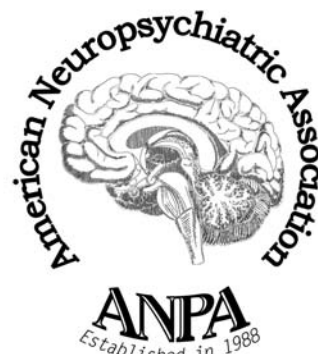

ANPA holds an annual scientific meeting that offers the opportunity to earn up to 28.5 CE/CME credits and 10 MOC credits. Members are encouraged to submit their work for presentation at our annual meetings. Travel awards are available for promising trainee clinicians and investigators. Annual meeting abstracts and proceedings are published in *JNCN*.

## Benefits of Membership ←

- Subscription to *The Journal of Neuropsychiatry and Clinical Neurosciences (JNCN)*
- Discounts on subscriptions to PsychiatryOnline.com including DSM Premium and DSM Premium Plus
- Opportunities for presenting at the annual meeting with accepted abstracts published in the *JNCN*
- Significantly reduced registration fees at the annual meeting
- Newsletters, news updates, information on job and training opportunities, research and meeting information on the ANPA web site: [www.anpaonline.org](http://www.anpaonline.org)
- Discounted membership and meeting registration fees for trainees and students
- Collaboration in clinical, educational and research activities with opportunities to interact with leaders in the field
- Complimentary video recordings of the annual meetings
- Access to educational slide sets assembled by the Education Committee
- Membership in Special Interest Groups (SIGs) designed to draw together ANPA members with similar clinical, research, and academic interests for the purposes of peer discussion, education, and potential collaboration

## Contact Information ←

— **Join ANPA Now!**

Website: [www.anpaonline.org](http://www.anpaonline.org) • Email: [anpaoffice@gmail.com](mailto:anpaoffice@gmail.com)

**Don't miss ANPA's 27<sup>th</sup> Annual Meeting**

**San Diego, California • March 16-19, 2016**

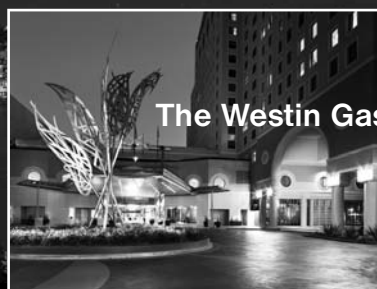

Join online at: [www.anpaonline.org](http://www.anpaonline.org)



# American Neuropsychiatric Association

The Westin Gaslamp Quarter

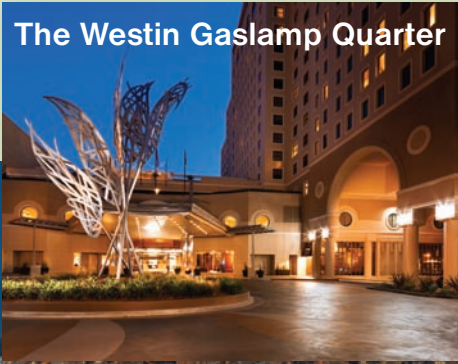

## San Diego, California

### March 16-19, 2016

# Register NOW

As a AAA Four Diamond hotel, *The Westin San Diego Gaslamp Quarter* is a true destination among downtown San Diego hotels.

For the convenience of Annual Meeting attendees, a block of discounted rooms has been reserved. Discounted rates of \$199.00 per night have been arranged for regular ANPA Annual Meeting attendees. A limited number of student rooms are reserved at a rate of \$179.00. For more information visit: <http://www.anpaonline.org/venue-information>

**Register TODAY:** [www.anpaonline.org/event-registration](http://www.anpaonline.org/event-registration)

**SPEAKER HIGHLIGHT:** Ann M. Graybiel, PhD; Karl Deisseroth, MD, PhD; David G. Amaral, PhD; Antonio Damasio, MD, PhD

#### SESSIONS OVERVIEW:

- Neural Substrates of Intellect and Emotion
- Over and Over Again: Clinical and Biological Aspects of Stereotypic Disorders
- Body Image in Neuropsychiatry
- Neuropsychiatric Aspects of Suicidal Behavior: Insights from Epilepsy
- The Neuropsychiatric Presentation of Metabolic Disorders in Pediatric Patients
- Clinical Neuroethics in a New Era of Neurointervention
- Neuropsychiatry Workshop 101: Psychopharmacology in Neuropsychiatry
- SBCN Workshop: Neuroenhancement: Promise, Perils, and Proof
- The Striatum And Decision-Making Based On Value
- Psychiatric Presentations Of C9orf72 Mutations:  
What Are the Clinical Implications for Neuropsychiatrists?

#### SESSION CHAIRS:

Kevin J. Black, MD  
Dale C. Hesdorffer, PhD  
Daniel I. Kaufer, MD  
Jay A. Salpekar MD  
Sanjai Rao, MD  
Jeremy D. Schmahmann, MD  
Michael R. Trimble, MD  
Anthony P. Weiss, MD, MBA

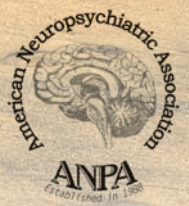

**Earn up to 28.5 CME/CE credits, 10 MOC credits**

For more information contact the American Neuropsychiatric Association office at: [anpaoffice@gmail.com](mailto:anpaoffice@gmail.com)

SAN  
DIEGO
