WINTER 2016 | VOLUME 28 | NUMBER 1

The Journal of  
**Neuropsychiatry**  
and Clinical Neurosciences

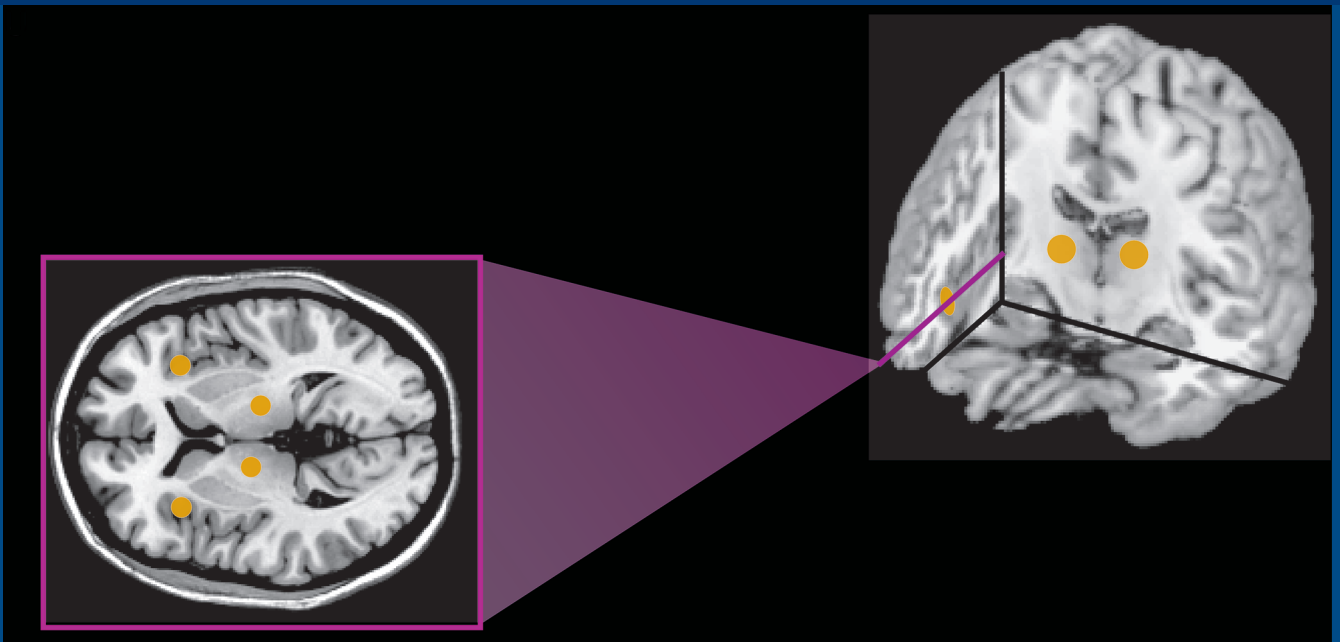

Working Memory Models: Insights From Neuroimaging

Suicide and Chronic Traumatic Encephalopathy

Clinical Implications of the National Institute of Neurological Disorders and  
Stroke Criteria for Diagnosing Psychosis in Parkinson's Disease

Predictors of Recovery From Posttraumatic Amnesia

Pathophysiological Role of HERV-W in Schizophrenia

Mixed-Handedness in Identical Twins Discordant for Combat Exposure  
in Vietnam: Relationship to Posttraumatic Stress Disorder

Official Journal of the American Neuropsychiatric Association  
[neuro.psychiatryonline.org](http://neuro.psychiatryonline.org)
